# Supplementary material for: A functional tool to explore the reliability of micro-earthquake focal mechanism solution for seismotectonic purposes
Source: Copernicus journal article supplement (doi:10.5194/se-2021-88), 2021-08-10
Supplement: Supplementary file 1 [file se-2021-88-supplement.pdf]

1 ***Supplementary Materials of***

2

3 **A functional tool to explore the reliability of micro-earthquake focal**  
4 **mechanism solution for seismotectonic purposes**

5

6 **G.M. Adinolfi <sup>1\*</sup>, R. De Matteis <sup>1</sup>, R. De Nardis<sup>2</sup> and A. Zollo <sup>3</sup>**

7

8 <sup>1</sup> **Dipartimento di Scienze e Tecnologie, Università del Sannio Via dei Mulini, 59/A, 82100 Benevento,**  
9 **Italy**

10 <sup>2</sup> **Dipartimento di Scienze Psicologiche, della Salute e del Territorio, Università di Chieti-Pescara “G.**  
11 **d’Annunzio”, Via dei Vestini, 32, 66100, Chieti, Italy**

12 <sup>3</sup> **Dipartimento di Fisica, Università di Napoli “Federico II”, Complesso Universitario di Monte S. Angelo,**  
13 **via Cinthia, 80124 Napoli, Italy**

14 **\* Corresponding author: [gadinolfi@unisannio.it](mailto:gadinolfi@unisannio.it)**

15

16

17

18

19

20

21

22

23

24

25

26

27

28

29

30

31

32

33

34

35

36

37

38

39

40

41

42

43

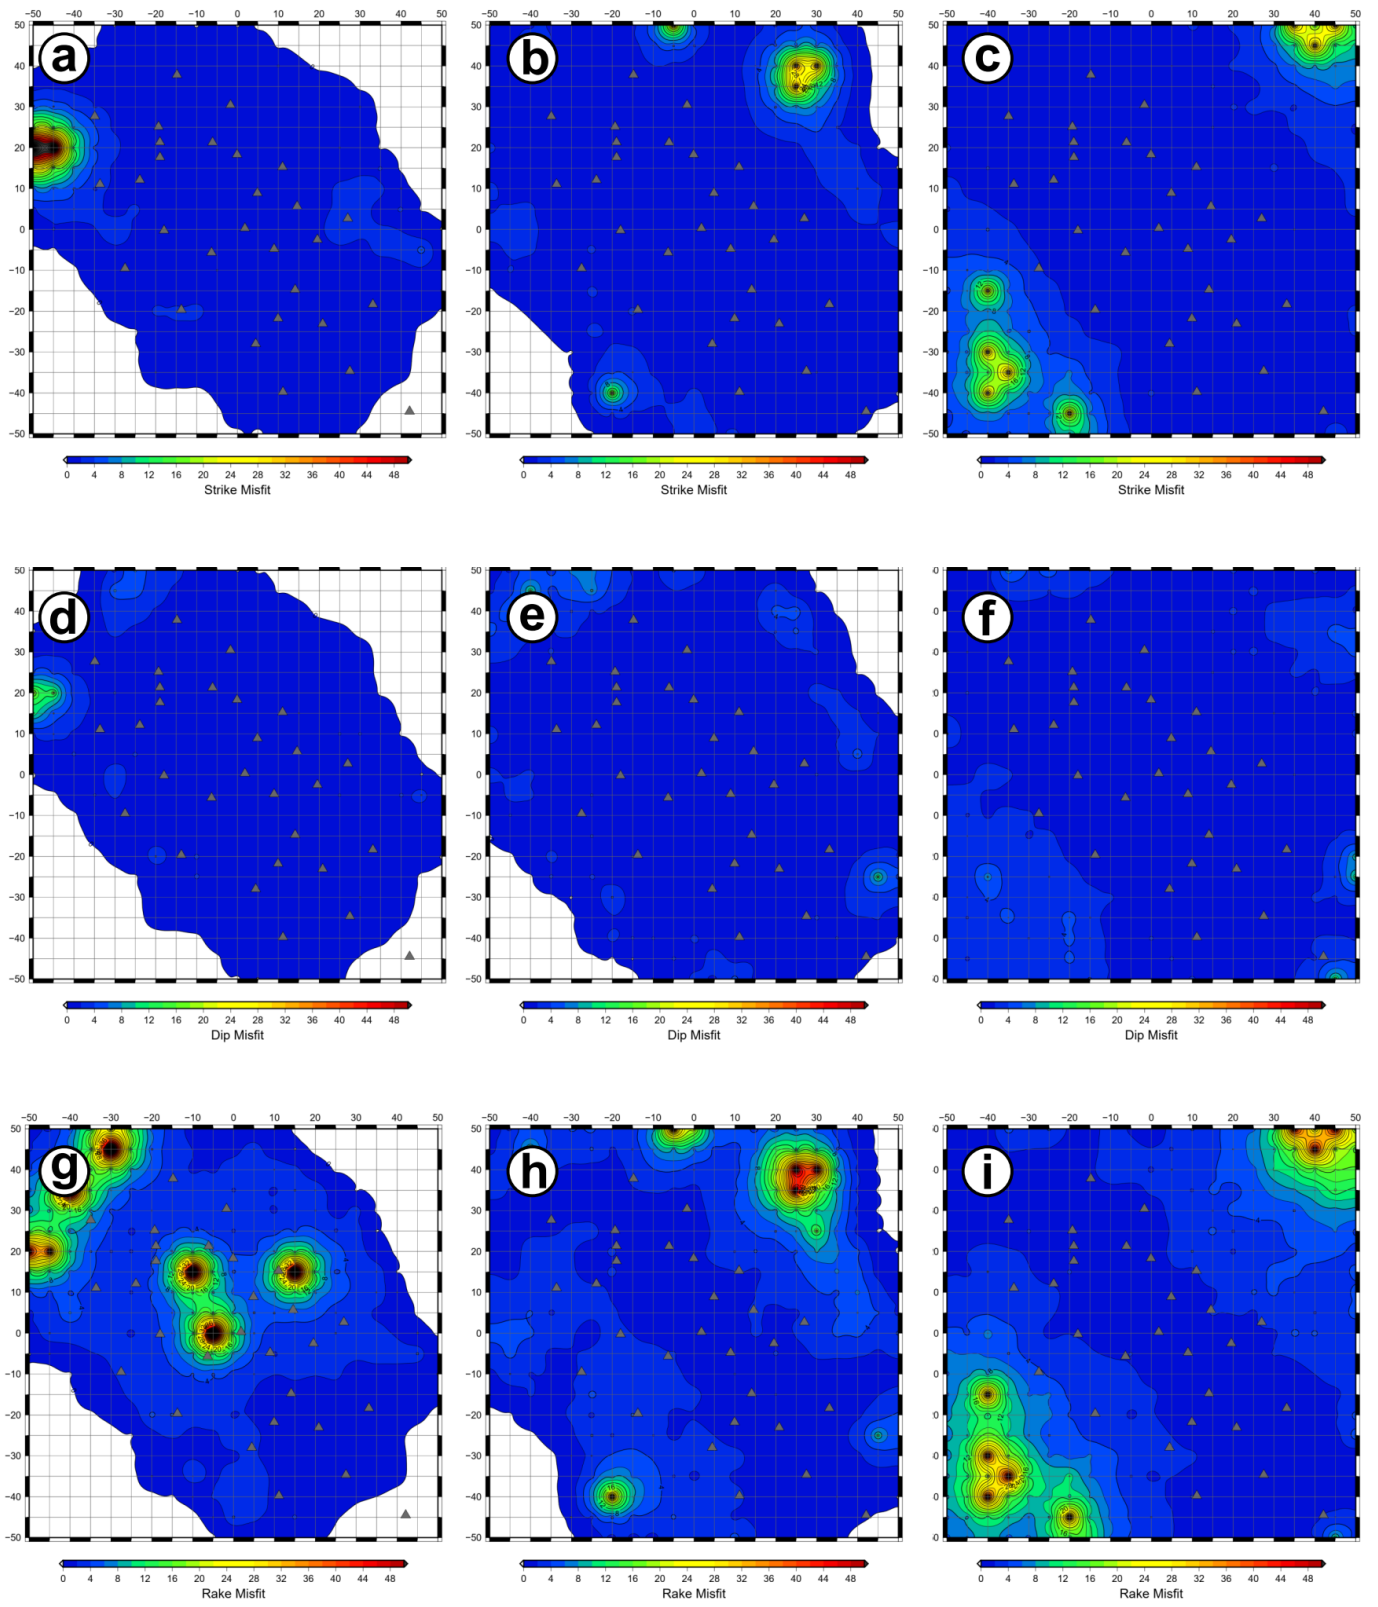

46 **Figure S1.** FMM (focal mechanism parameter misfit) maps for retrieved focal mechanisms with D3  
47 datasets as input data and simulating earthquakes with M1 (a, d, g), M2 (b, e, h) and M3 (c, f, i)  
48 magnitudes and FM2 theoretical fault plane solution at 10 km depth. a, b, c refer to strike misfit; d, e,  
49 f refer to dip misfit; g, h, i refer to rake misfit. The level of gaussian noise is set to 5%.

50

51

52

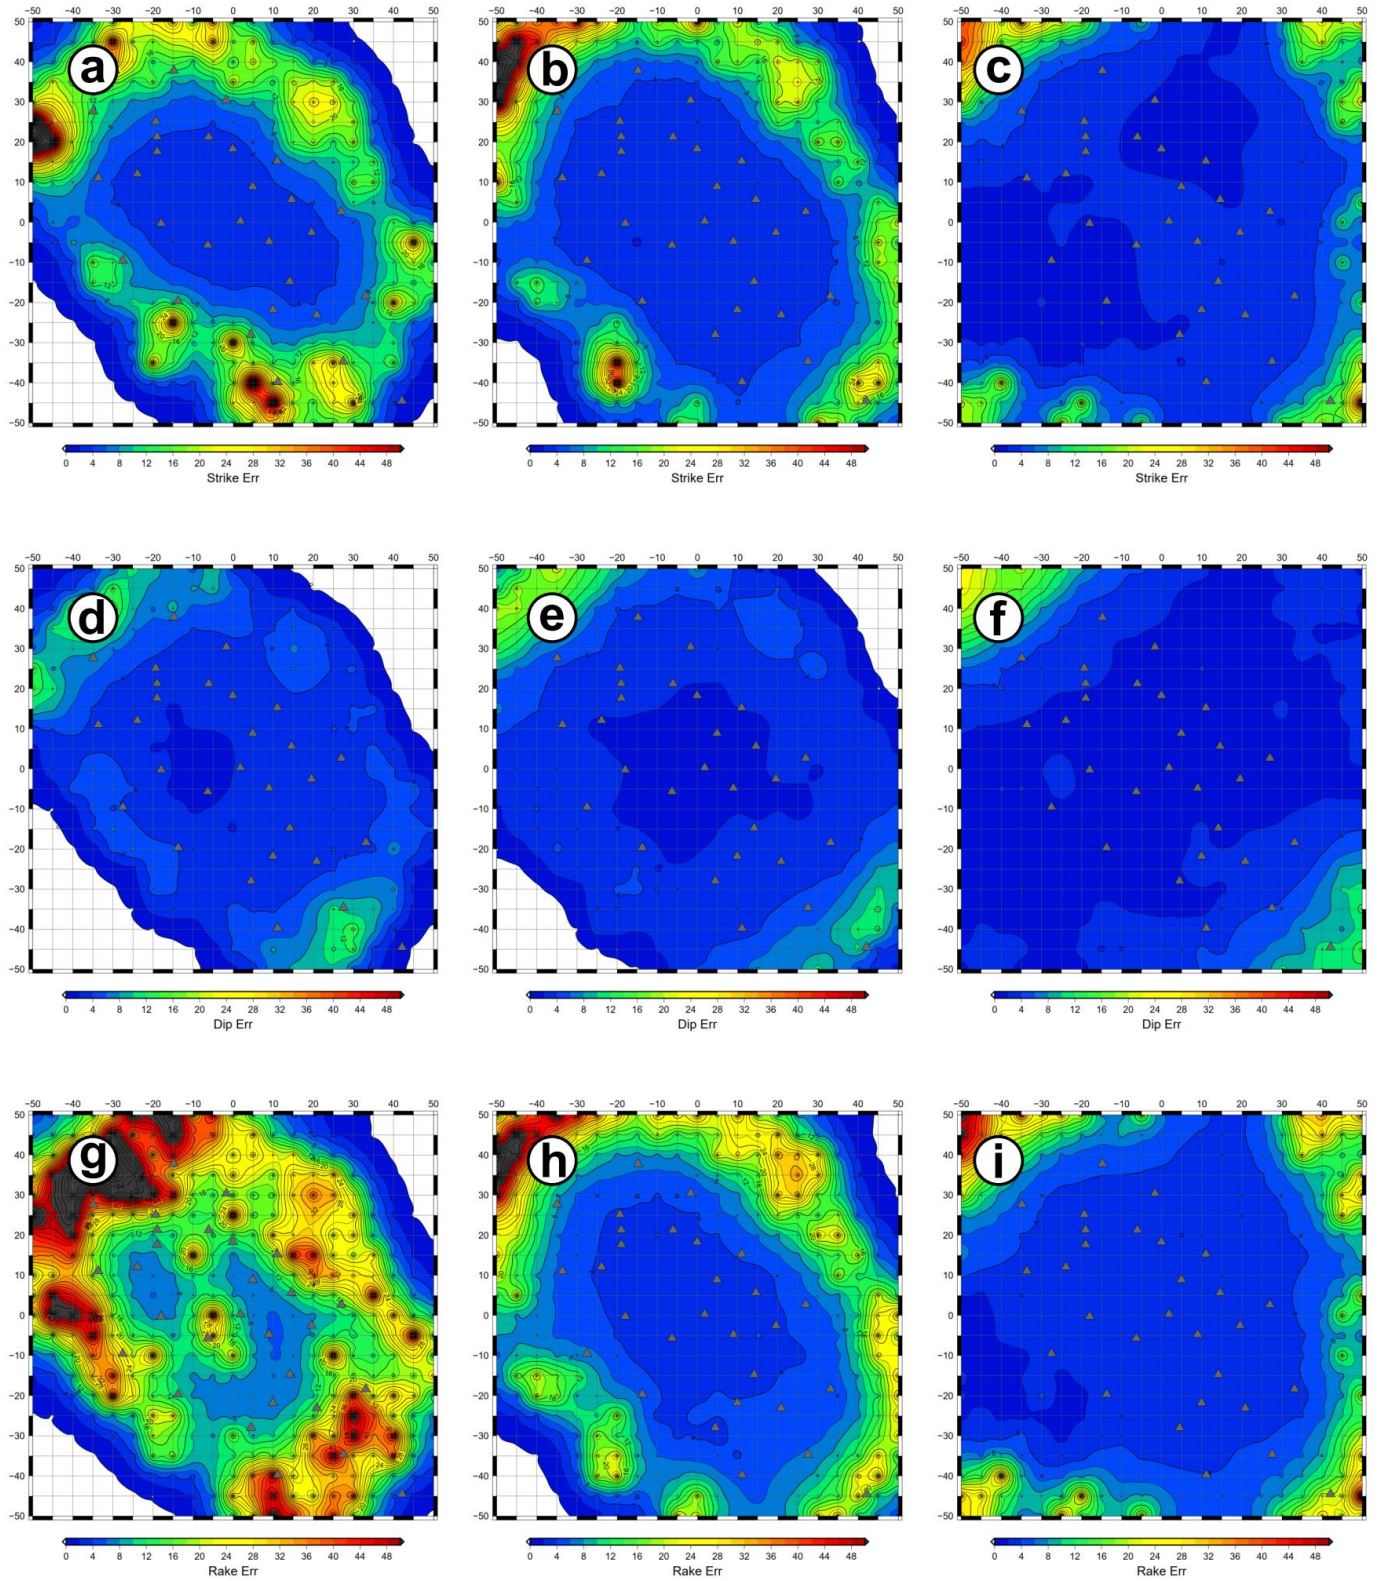

53  
 54 **Figure S2.** FME (strike, dip and rake error) maps for retrieved focal mechanisms with D3 datasets as  
 55 input data and simulating earthquakes with M1 (a, d, g), M2 (b, e, h) and M3 (c, f, i) magnitudes and

56 FM2 theoretical fault plane solution at 10 km depth. a, b, c refer to strike error; d, e, f refer to dip error;  
57 g, h, i refer to rake error. The level of gaussian noise is set to 5%.  
58

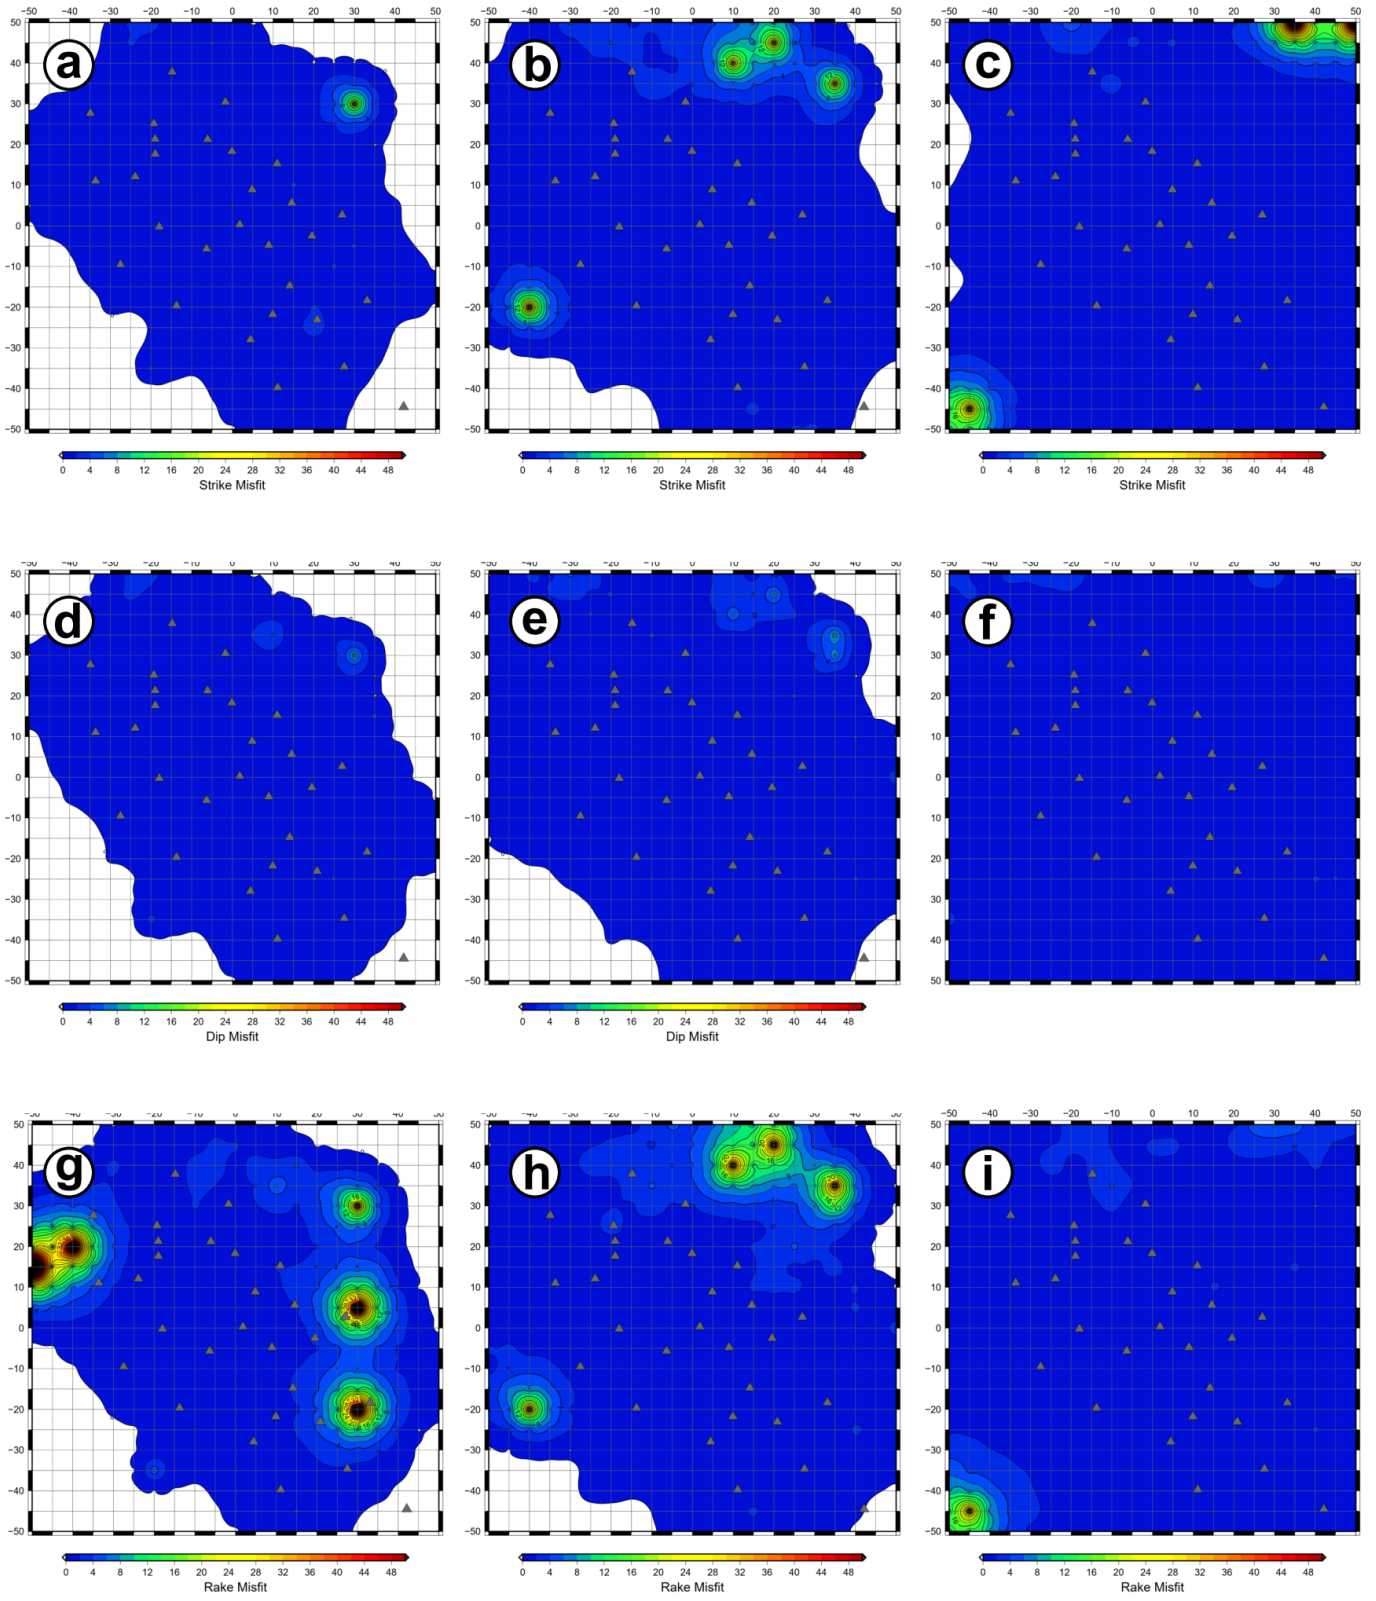

59  
60

61 **Figure S3.** FMM (focal mechanism parameter misfit) maps for retrieved focal mechanisms with D3  
62 datasets as input data and simulating earthquakes with M1 (a, d, g), M2 (b, e, h) and M3 (c, f, i)  
63 magnitudes and FM3 theoretical fault plane solution at 10 km depth. a, b, c refer to strike misfit; d, e,  
64 f refer to dip misfit; g, h, i refer to rake misfit. The level of gaussian noise is set to 5%.  
65  
66  
67  
68  
69  
70  
71  
72

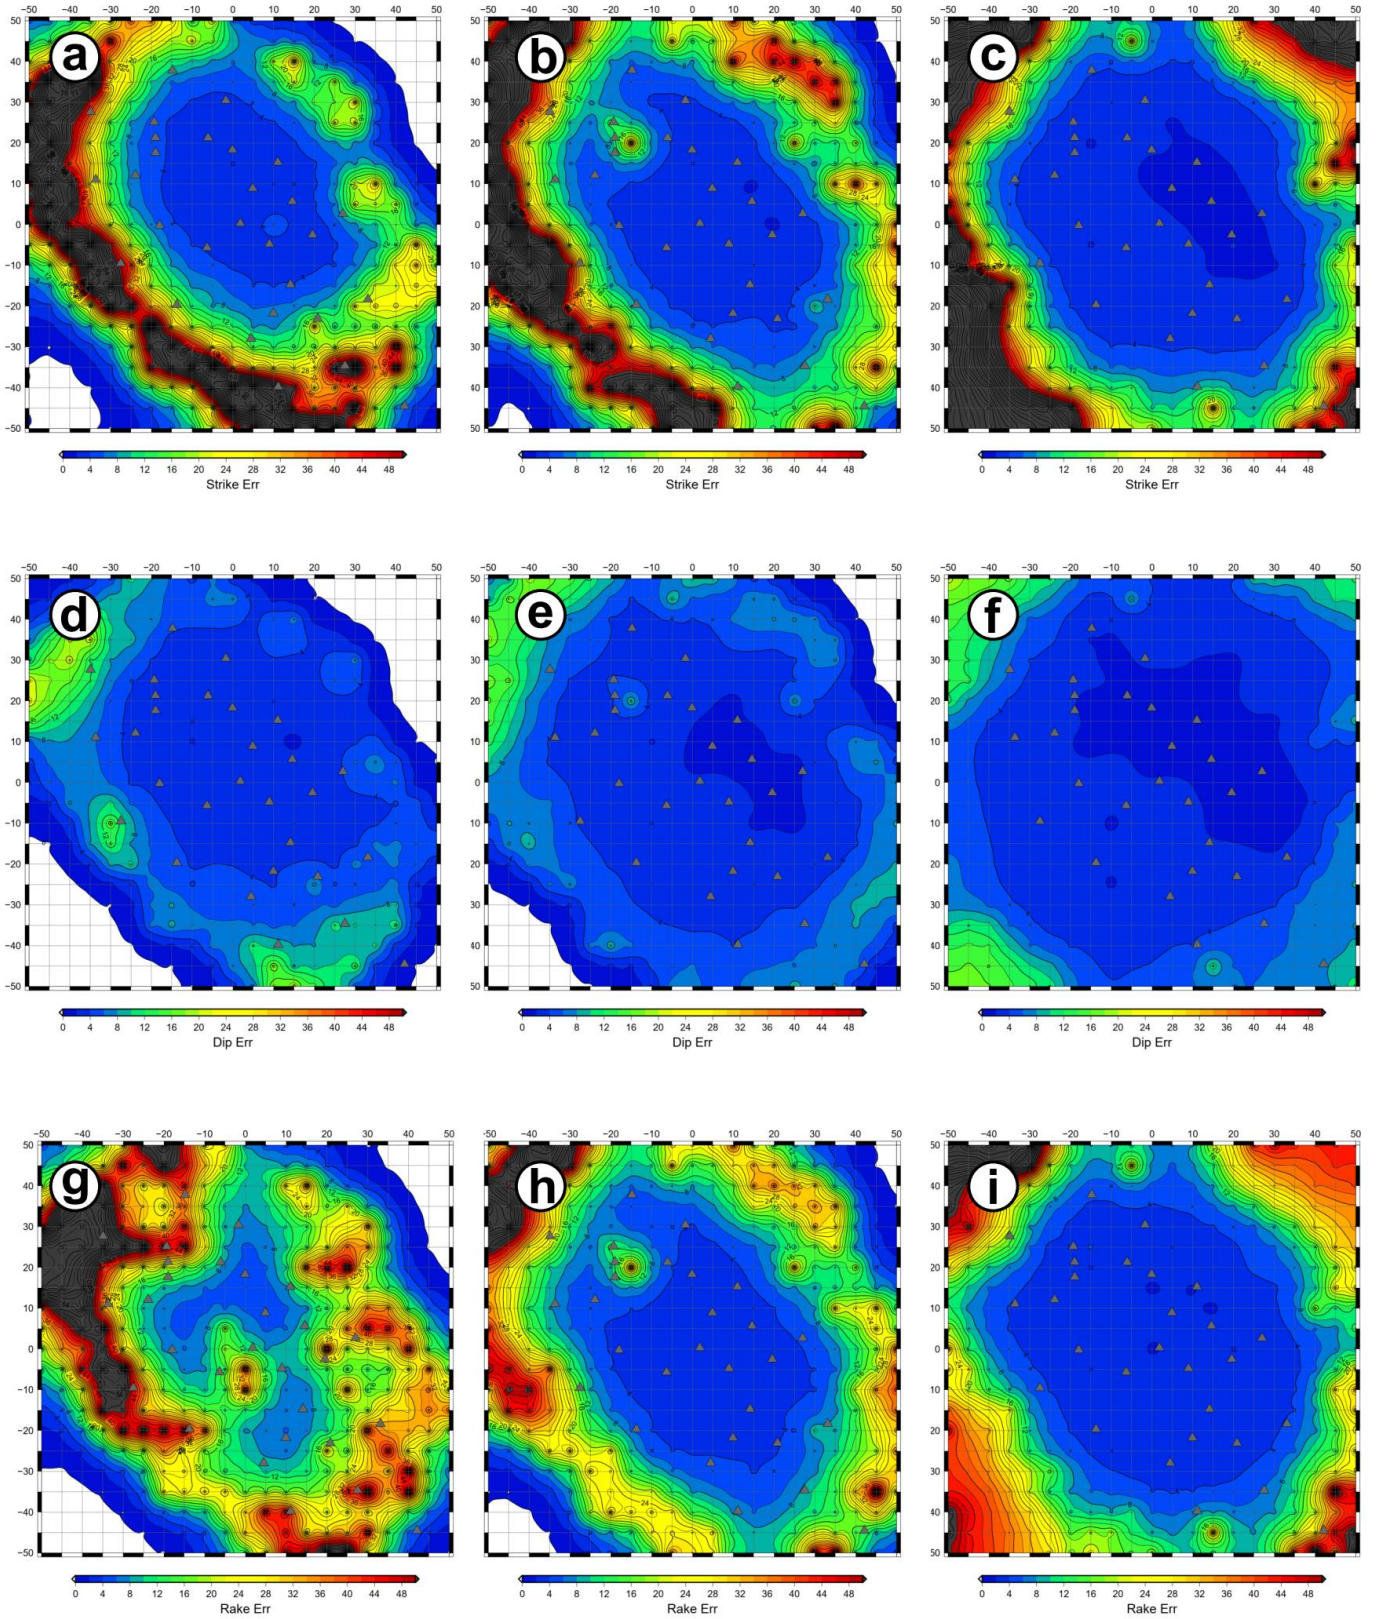

73  
 74 **Figure S4.** FME (strike, dip and dake error) maps for retrieved focal mechanisms with D3 datasets as  
 75 input data and simulating earthquakes with M1 (a, d, g), M2 (b, e, h) and M3 (c, f, i) magnitudes and



76 FM3 theoretical fault plane solution at 10 km depth. a, b, c refer to strike error; d, e, f refer to dip error;  
77 g, h, i refer to rake error. The level of gaussian noise is set to 5%.

78

79

80

81

82

83

84

85

86

87

88

89

90

91

92

93

94

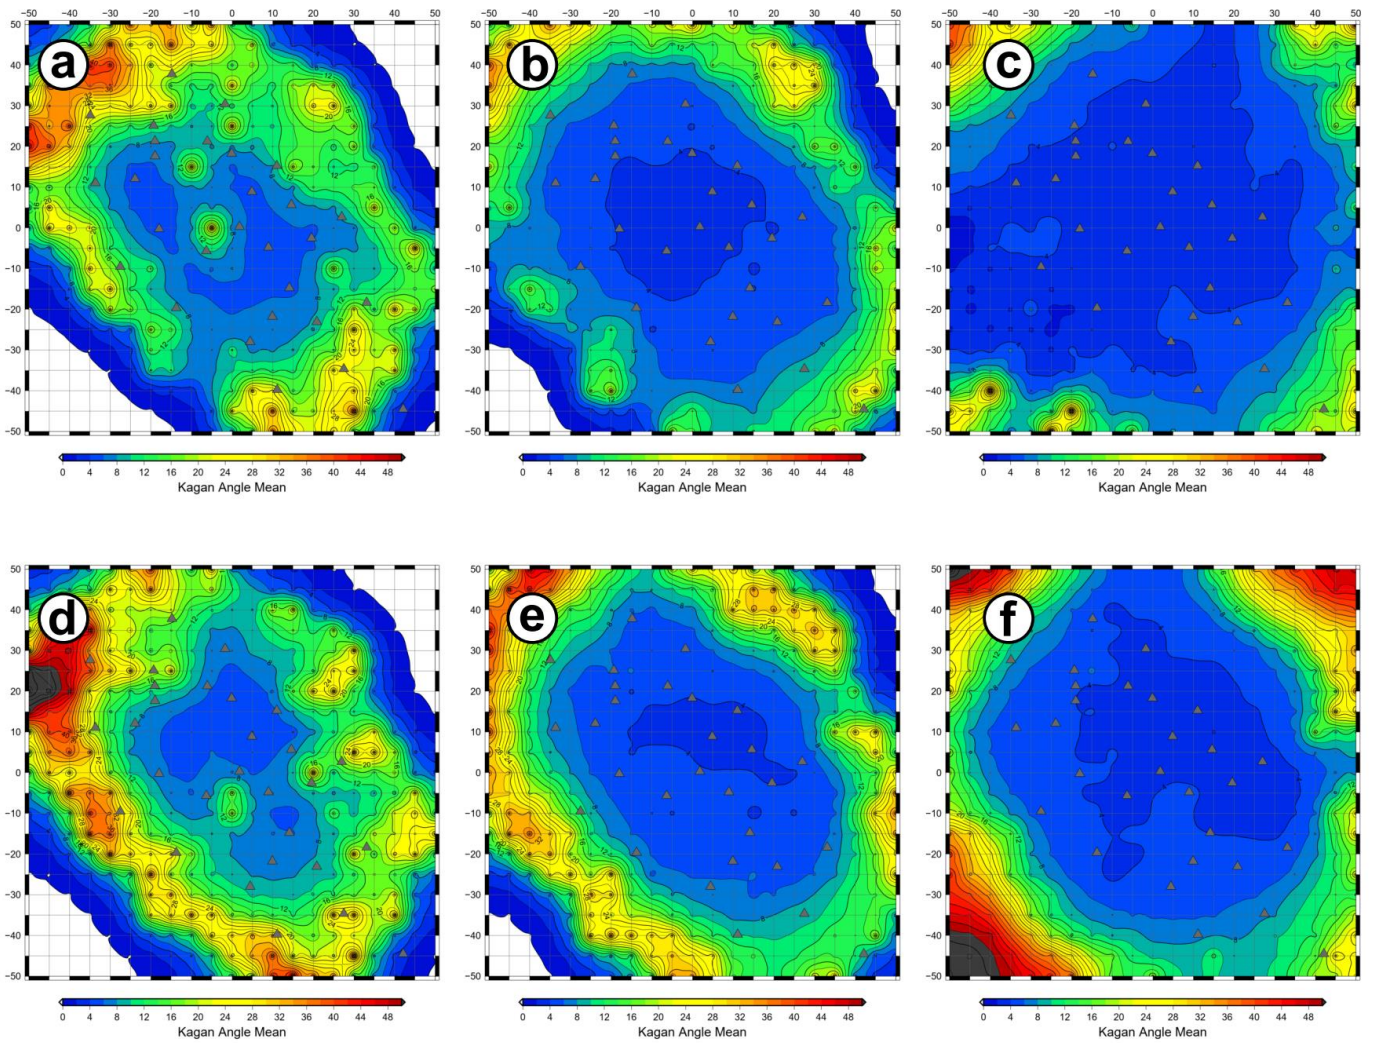

95  
 96 **Figure S5** KAA (Kagan angle average) maps for retrieved focal mechanisms with D3 datasets as input  
 98 data and simulating earthquakes with M1 (a, d), M2 (b, e) and M3 (c, f) magnitudes and FM2 (a, b, c)  
 99 and FM3 (d, e, f) theoretical fault plane solution. The level of gaussian noise is set to 5%.

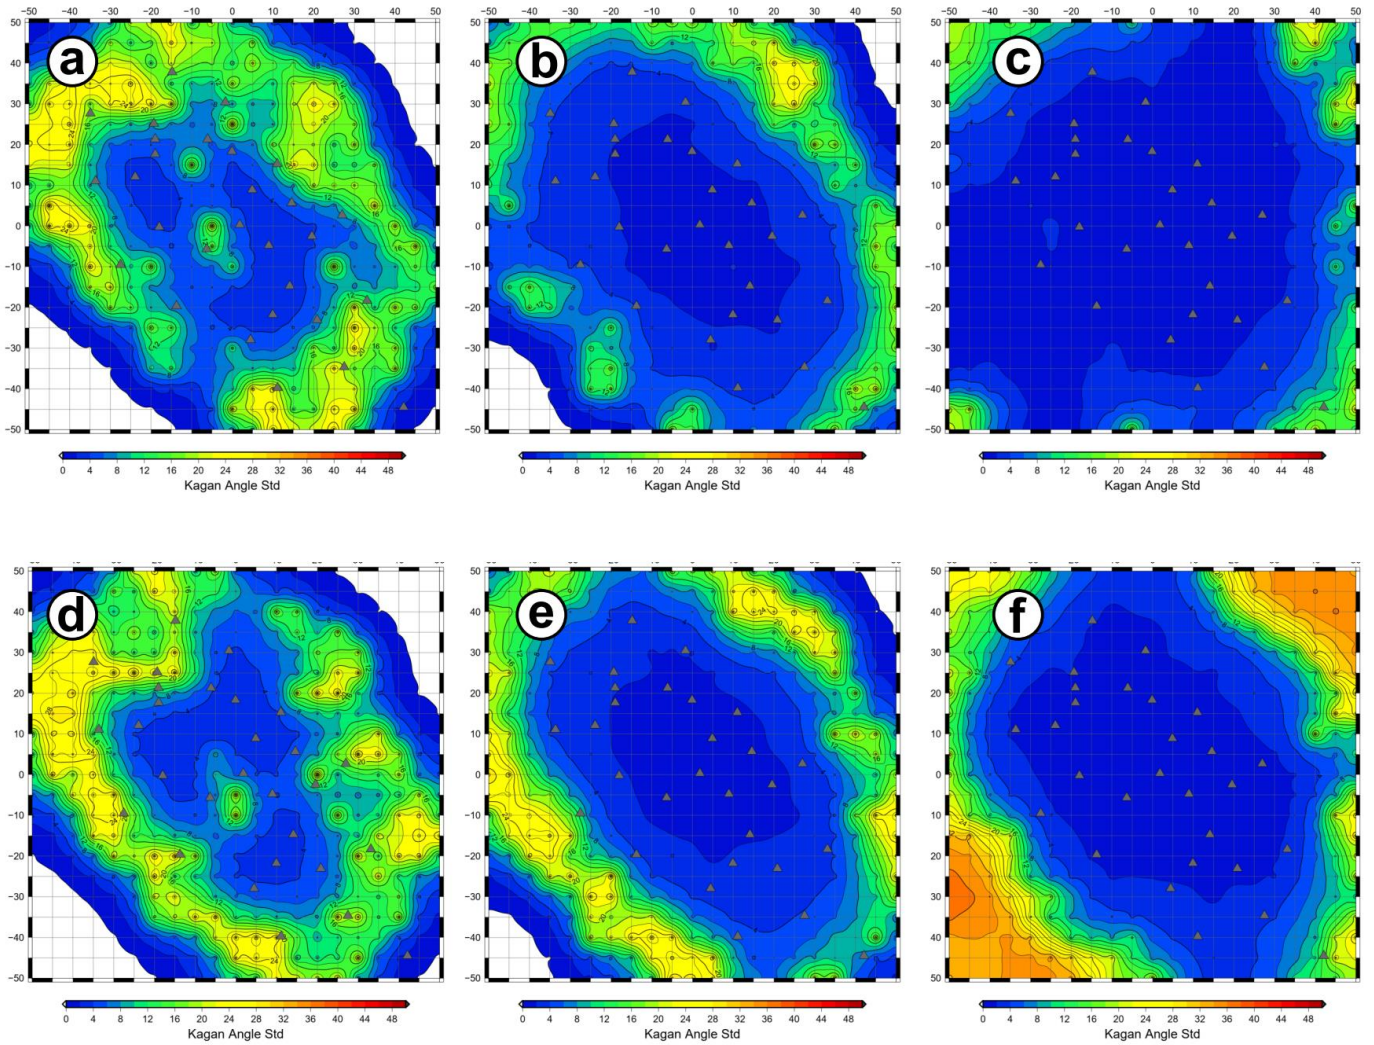

114  
115  
116  
117  
118  
119  
120  
121  
122  
123  
124  
125  
126  
127  
128  
129  
130

**Figure S6.** KAS (Kagan angle standard deviation) maps for retrieved focal mechanisms with D3 datasets as input data and simulating earthquakes with M1 (a, d), M2 (b, e) and M3 (c, f) magnitudes and FM2 (a, b, c) and FM3 (d, e, f) theoretical fault plane solution. The level of gaussian noise is set to 5%.
